# Supplementary material for: Inferring repeat-protein energetics from evolutionary information
Source: PubMed Central journal article supplement (PMC5491312; doi:10.1371/journal.pcbi.1005584), 2017-06-15

# ANK

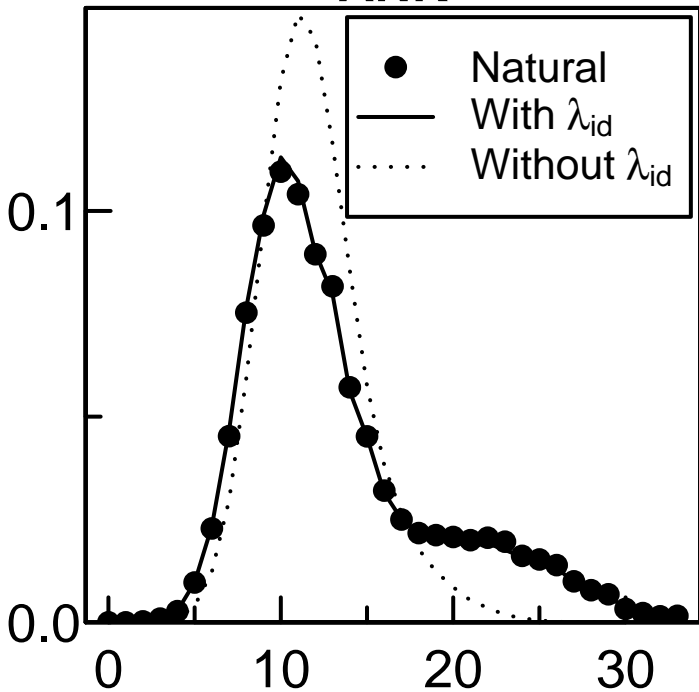

Supplement: pcbi.1005584.s001.pdf [file pcbi.1005584.s001.pdf]
