# Supplementary material for: Inferring repeat-protein energetics from evolutionary information
Source: PubMed Central journal article supplement (PMC5491312; doi:10.1371/journal.pcbi.1005584), 2017-06-15

### ANK

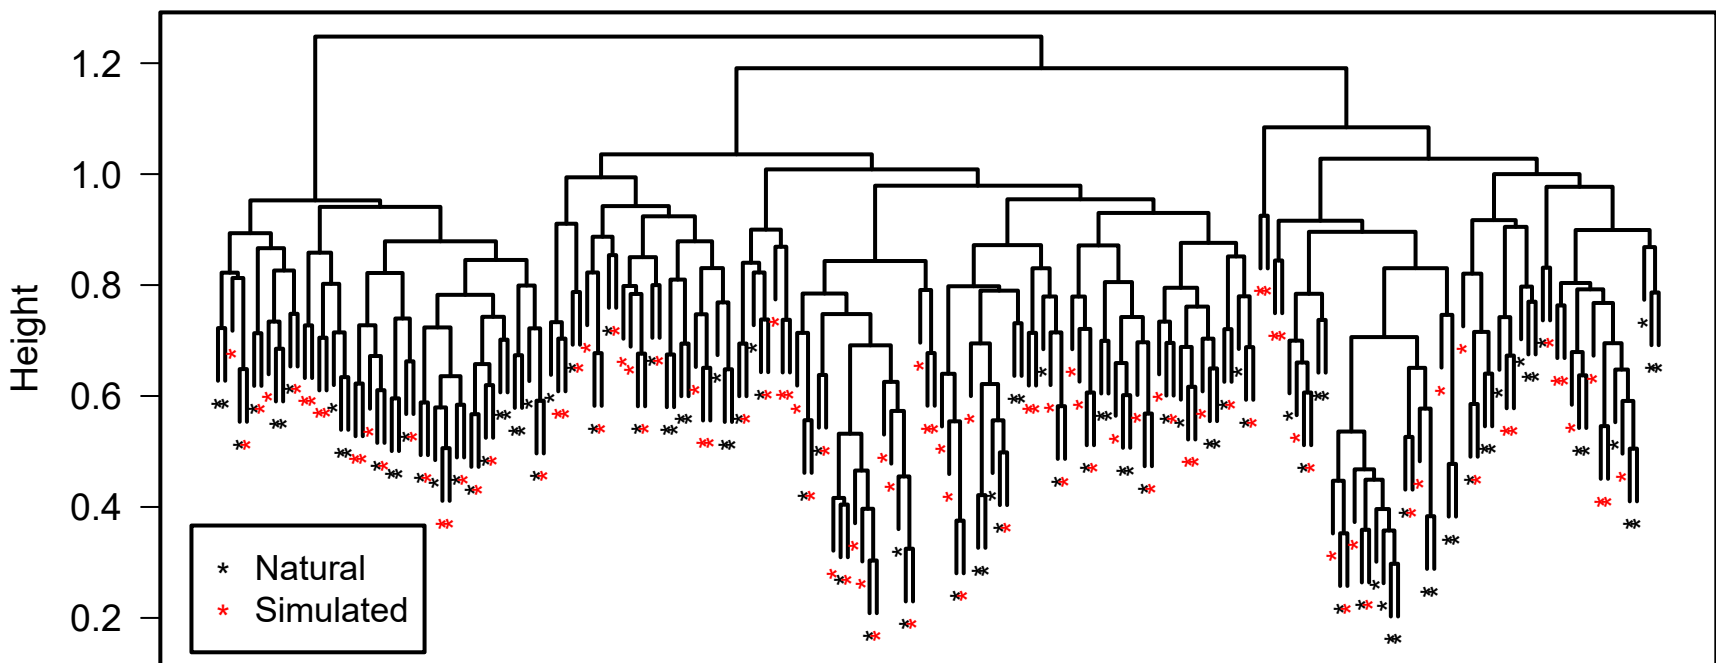

### TPR

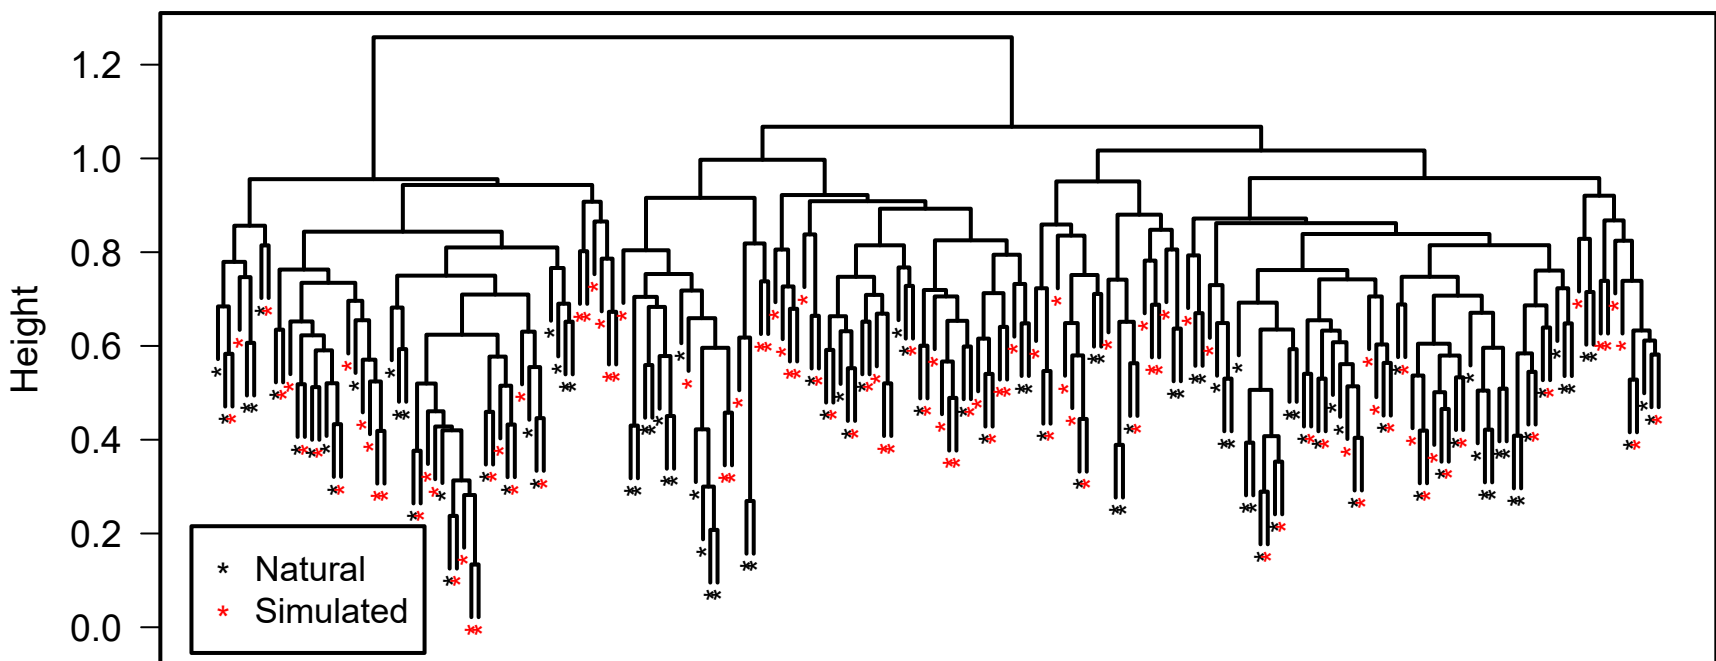

### LRR

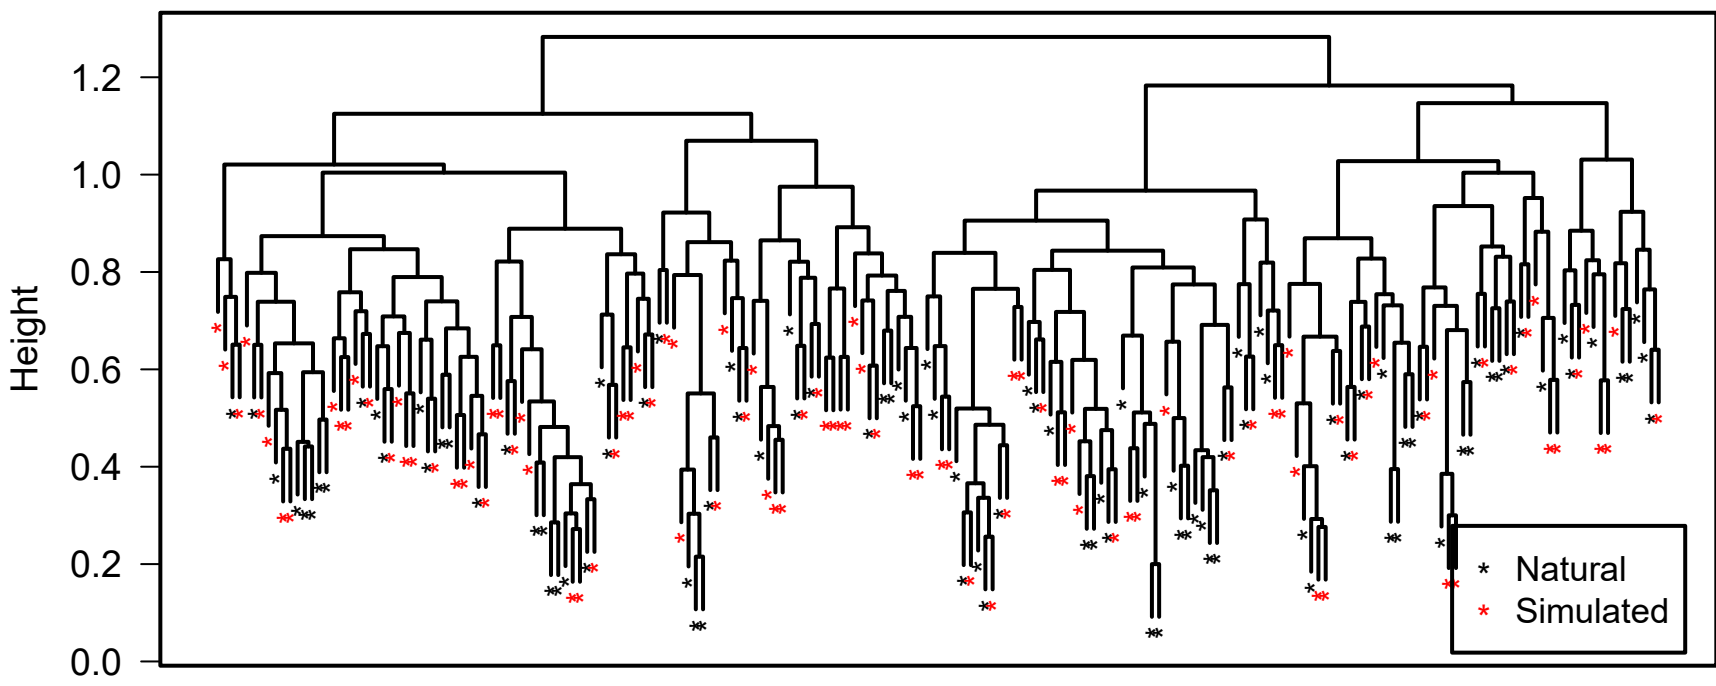

Supplement: pcbi.1005584.s004.pdf [file pcbi.1005584.s004.pdf]
